# Supplementary material for: Optimizing the ORR activity of Pd based nanocatalysts by tuning their strain and particle size
Source: Royal Society of Chemistry journal article supplement (doi:10.1039/c7ta02479g), 2017-01-01
Supplement: c7ta02479g1.pdf [file c7ta02479g1.pdf]

Supporting information

## Optimizing the Oxygen Reduction Reaction Activity of Pd Based Nanocatalyst by Tuning **Strain** and Particle Size

Weiping Xiao,<sup>a</sup> Marco Aurelio Liuthevicene Cordeiro,<sup>b</sup> Mingxing Gong,<sup>a</sup> Lili Han,<sup>c</sup> Jie Wang,<sup>a</sup> Ce Bian,<sup>a</sup> Jing Zhu,<sup>a</sup> Huolin Xin,<sup>b</sup> and Deli Wang<sup>a,\*</sup>

**Table S1** The ICP-AES results of Pd<sub>2</sub>FeCo@Pt/C catalyst.

| Pd <sub>2</sub> FeCo@Pt/C | Weight ratio      | Atom ratio         |
|---------------------------|-------------------|--------------------|
| Pt:Pd:Fe:Co-initial       | 2.7:100:23.0:25.5 | 1.5:100: 43.7:46.0 |
| Pt:Pd:Fe:Co-ADT           | 3.1:100:21.7:23.5 | 1.7:100: 41.2:42.3 |

**Table S2** Comparison of MA at 0.9 V for Pd(Au)M@Pt and Pt/C extracted from literature.

| Catalysts                                         | MA at<br>0.9 V <sub>RHE</sub>         | MA (Pt/C) at<br>0.9 V <sub>RHE</sub>   | Electrolyte                          | Refs      |
|---------------------------------------------------|---------------------------------------|----------------------------------------|--------------------------------------|-----------|
| Pd@Pt <sub>2-3L</sub>                             | 0.49 A mg <sub>Pt</sub> <sup>-1</sup> | 0.1 A mg <sub>Pt</sub> <sup>-1</sup>   | 0.1 M HClO <sub>4</sub>              | 1         |
| Pd(core)-Pt(shell)                                | 0.2 A mg <sub>Pt</sub> <sup>-1</sup>  | 0.12 A mg <sub>Pt</sub> <sup>-1</sup>  | 0.1 M HClO <sub>4</sub>              | 2         |
| Pd@Pt <sub>1L</sub>                               | 0.35 A mg <sub>Pt</sub> <sup>-1</sup> | 0.12 A mg <sub>Pt</sub> <sup>-1</sup>  | 0.1 M HClO <sub>4</sub>              | 3         |
| Pd@Pt                                             | 1.6 A mg <sub>Pt</sub> <sup>-1</sup>  | 0.32 A mg <sub>Pt</sub> <sup>-1</sup>  | 0.1 M HClO <sub>4</sub>              | 4         |
| Pd@Pt <sub>1.8Ni</sub>                            | 0.8 A mg <sub>Pt</sub> <sup>-1</sup>  | 0.16 A mg <sub>Pt</sub> <sup>-1</sup>  | 0.1 M HClO <sub>4</sub>              | 5         |
| Pt <sub>ML</sub> /Pd <sub>9</sub> Au <sub>1</sub> | 0.31 A mg <sub>Pt</sub> <sup>-1</sup> | 0.1 A mg <sub>Pt</sub> <sup>-1</sup>   | 0.1 M HClO <sub>4</sub>              | 6         |
| Pd@Pt                                             | 1.56 A mg <sub>Pt</sub> <sup>-1</sup> | 0.081 A mg <sub>Pt</sub> <sup>-1</sup> | 0.1 M HClO <sub>4</sub>              | 7         |
| Pd <sub>3</sub> Au@Pt                             | 0.94 A mg <sub>Pt</sub> <sup>-1</sup> | 0.203 A mg <sub>Pt</sub> <sup>-1</sup> | 0.1 M HClO <sub>4</sub>              | 8         |
| AuCu@Pt                                           | 0.56 A mg <sub>Pt</sub> <sup>-1</sup> | 0.098 A mg <sub>Pt</sub> <sup>-1</sup> | 0.5 M H <sub>2</sub> SO <sub>4</sub> | 9         |
| AuCu@Pt                                           | 0.57 A mg <sub>Pt</sub> <sup>-1</sup> | 0.11 A mg <sub>Pt</sub> <sup>-1</sup>  | 0.1 M HClO <sub>4</sub>              | 10        |
| Pd@Pt-Ni                                          | 2.5 A mg <sub>Pt</sub> <sup>-1</sup>  | 0.2 A mg <sub>Pt</sub> <sup>-1</sup>   | 0.1 M HClO <sub>4</sub>              | 11        |
| Pd <sub>8</sub> CoZn@Pt                           | 2.18A mg <sub>Pt</sub> <sup>-1</sup>  | 0.07 A mg <sub>Pt</sub> <sup>-1</sup>  | 0.1 M HClO <sub>4</sub>              | 12        |
| Pd@Pt                                             | 0.24 A mg <sub>Pt</sub> <sup>-1</sup> | 0.1 A mg <sub>Pt</sub> <sup>-1</sup>   | 0.1 M KOH                            | 13        |
| AuCu@Pt                                           | 0.86A mg <sub>Pt</sub> <sup>-1</sup>  | 0.088 A mg <sub>Pt</sub> <sup>-1</sup> | 0.1 M KOH                            | 14        |
| Pd <sub>2</sub> FeCo@Pt                           | 2.5 A mg <sub>Pt</sub> <sup>-1</sup>  | 0.066 A mg <sub>Pt</sub> <sup>-1</sup> | 0.1 M HClO <sub>4</sub>              | This work |
| Pd <sub>2</sub> FeCo@Pt                           | 5.4 A mg <sub>Pt</sub> <sup>-1</sup>  | 0.048 A mg <sub>Pt</sub> <sup>-1</sup> | 0.1 M KOH                            | This work |

**Table S3** Comparison of key performance parameters for Zn-air batteries extracted from literature.

| Catalysts                                        | Loading (mg cm <sup>-2</sup> ) | Peak power density      | Electrolyte                       | Refs      |
|--------------------------------------------------|--------------------------------|-------------------------|-----------------------------------|-----------|
| CuPt-NC                                          | 2.0                            | 250 mW cm <sup>-2</sup> | 6 M KOH                           | 15        |
| Pb <sub>2</sub> Ru <sub>2</sub> O <sub>6.5</sub> | —                              | 195 mW cm <sup>-2</sup> | 6 M KOH + 0.2 M ZnO               | 16        |
| P,S-CNS                                          | 0.5                            | 198 mW cm <sup>-2</sup> | 6 M KOH                           | 17        |
| S-DGF                                            | —                              | 300 mW cm <sup>-2</sup> | 6 M KOH + 0.2 M ZnCl <sub>2</sub> | 18        |
| C-CoPAN900                                       | 1.0                            | 125 mW cm <sup>-2</sup> | 6 M KOH + 0.2 M ZnCl <sub>2</sub> | 19        |
| CoO/N-CNT+NiFe LDH/CNT                           | 1.0                            | 265 mW cm <sup>-2</sup> | 6 M KOH + 0.2 M zinc acetate      | 20        |
| Co@NG-acid                                       | 1.0                            | 350 mW cm <sup>-2</sup> | 6 M KOH                           | 21        |
| CuFe alloy                                       |                                | 212 mW cm <sup>-2</sup> | 6 M KOH                           | 22        |
| NiCo <sub>2</sub> S <sub>4</sub> /N-CNT          | 1.0                            | 147 mW cm <sup>-2</sup> | 6 M KOH + 0.2 M ZnCl <sub>2</sub> | 23        |
| CoFe@NCNTs                                       | 1.0                            | 150 mW cm <sup>-2</sup> | 6 M KOH + 0.2 M zinc acetate      | 24        |
| Pd <sub>2</sub> FeCo/C                           | 1.0                            | 256 mW cm <sup>-2</sup> | 6 M KOH + 0.2 M zinc acetate      | This work |
| Pd <sub>2</sub> FeCo@Pt/C                        | 1.0                            | 308 mW cm <sup>-2</sup> | 6 M KOH + 0.2 M zinc acetate      | This work |

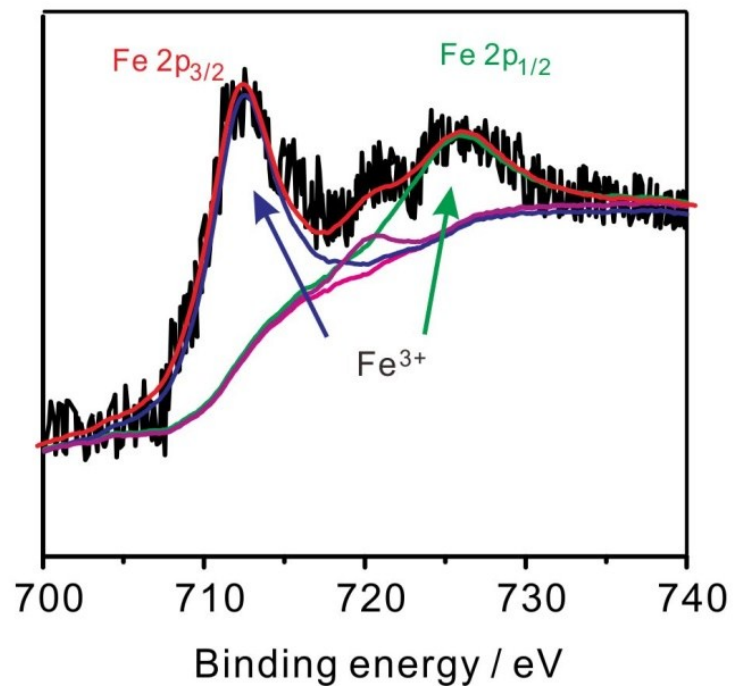

**Fig. S1** XPS curves of Fe on Pd<sub>2</sub>FeCo/C nanoparticles.

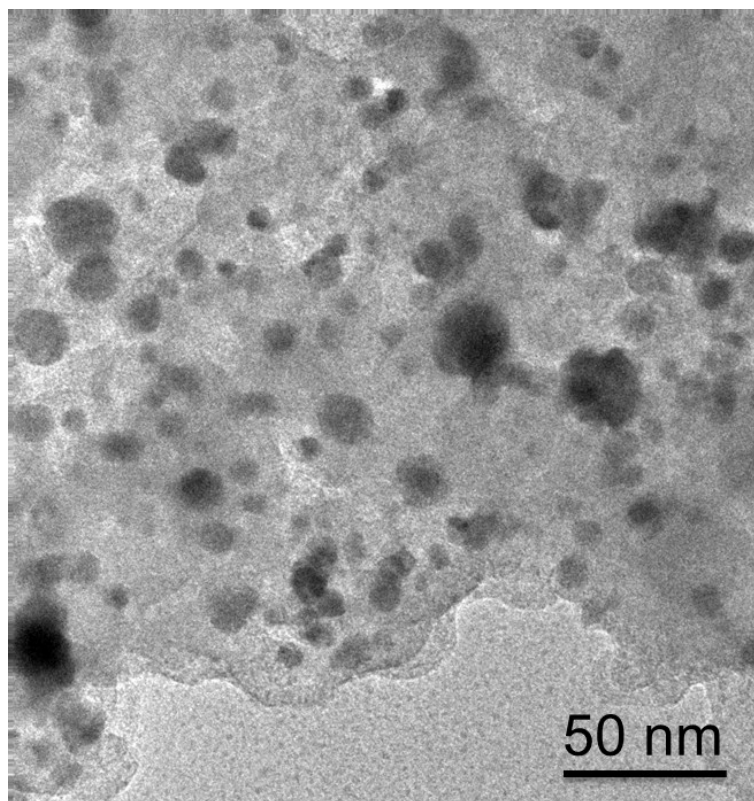

**Fig. S2** Overview STEM image of PdFe/C nanoparticles.

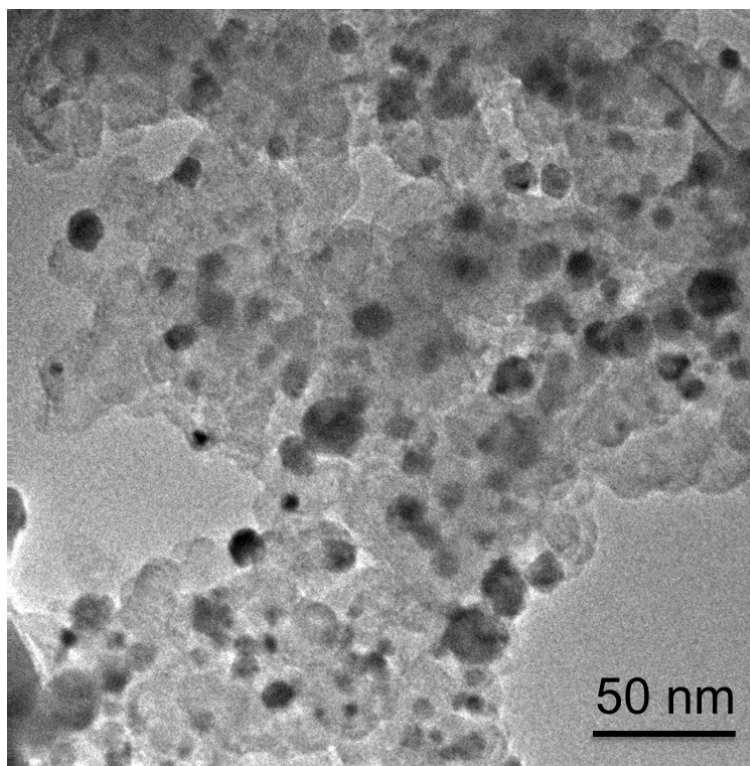

**Fig. S3** Overview STEM image of PdCo/C nanoparticles.

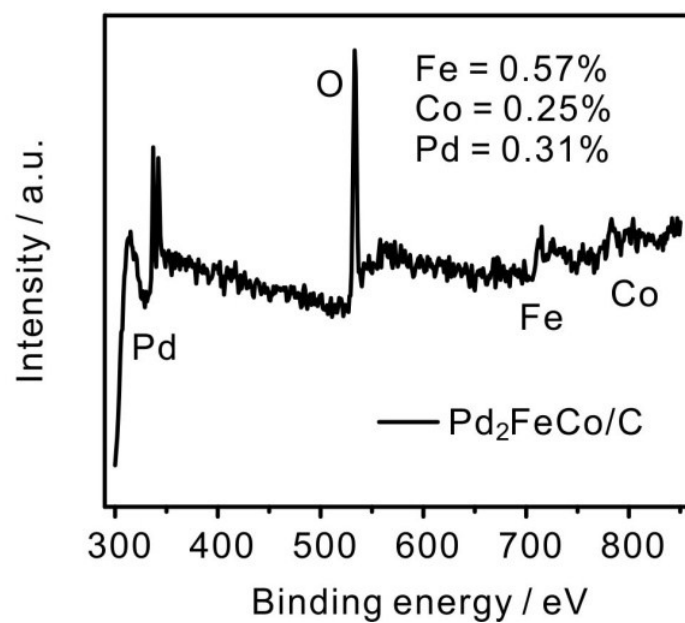

**Fig. S4** XPS curves of Pd<sub>2</sub>FeCo/C nanoparticles.

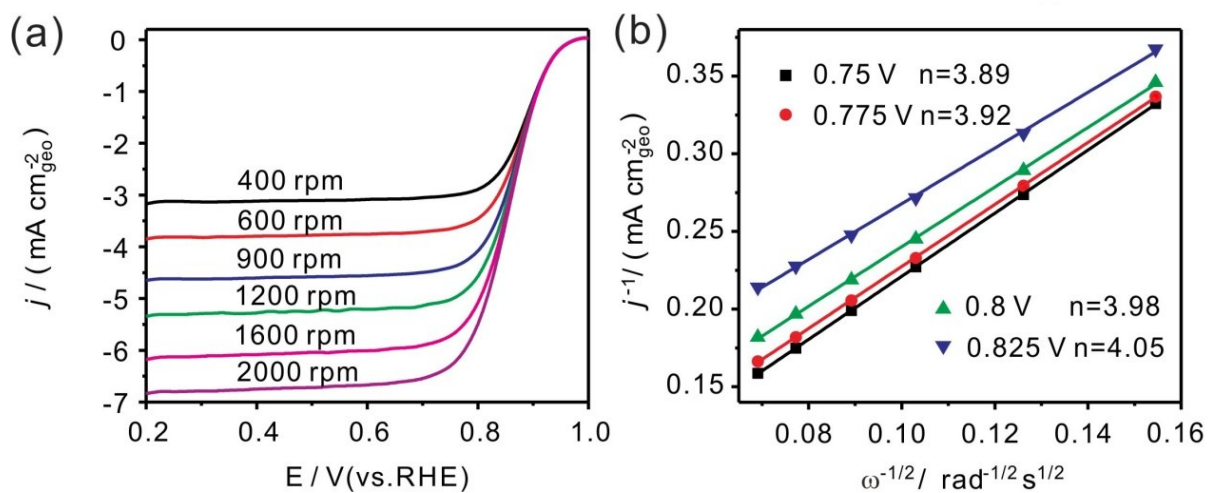

**Fig. S5** (a) The rotation-rate-dependent current-potential curves of Pd<sub>2</sub>FeCo/C. (b)

The Koutecky-Levich plots on Pd<sub>2</sub>FeCo/C at different potentials.

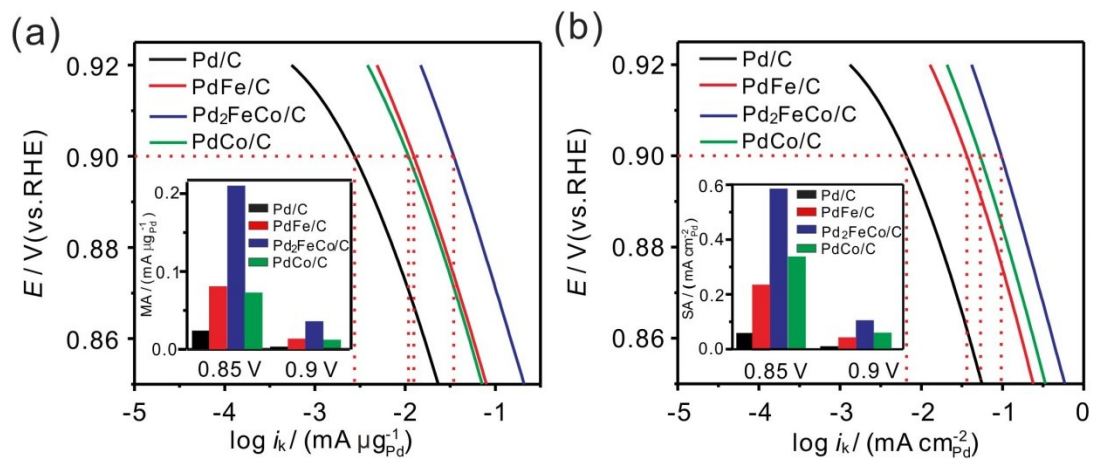

**Fig. S6** (a) Mass activities and (b) specific activities at 0.85 V and 0.9 V, respectively.

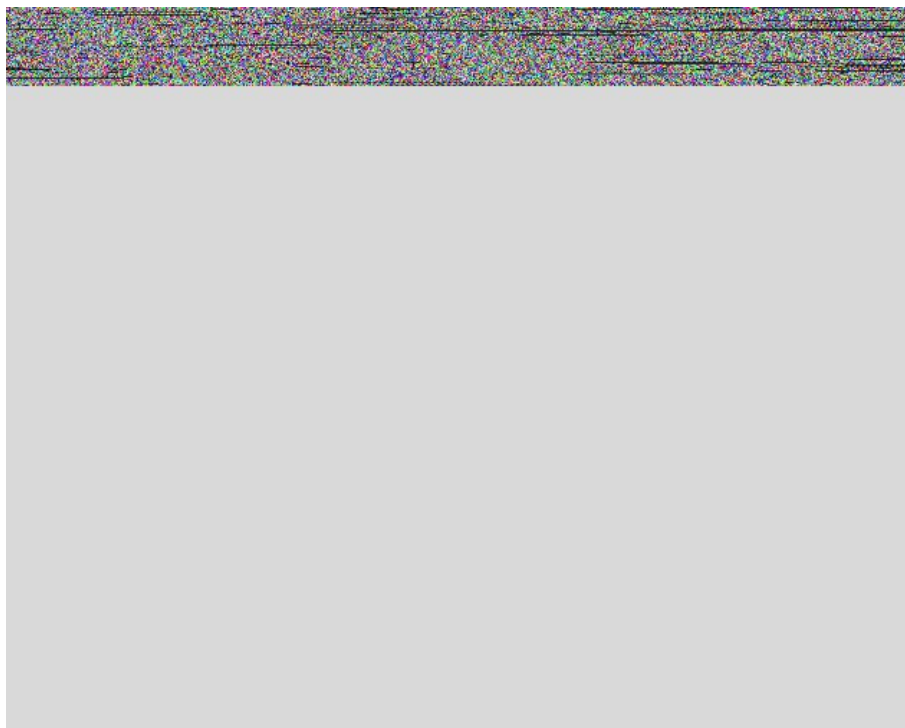

**Fig. S7** CV curves of Pd/C, PdFe/C, PdCo/C and Pd<sub>2</sub>FeCo/C in N<sub>2</sub>-saturated 0.1 M HClO<sub>4</sub> solution, sweep rate, 50 mV s<sup>-1</sup>.

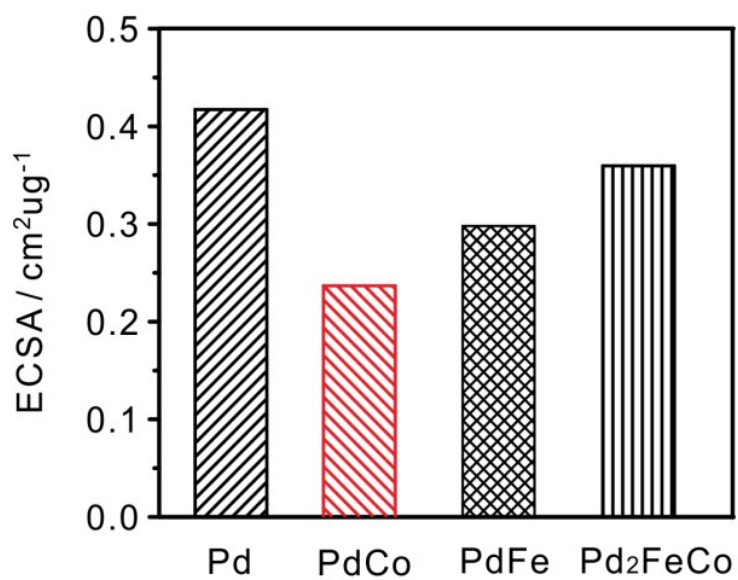

**Fig. S8** ECSA of Pd/C, PdFe/C, PdCo/C and Pd<sub>2</sub>FeCo/C catalysts.

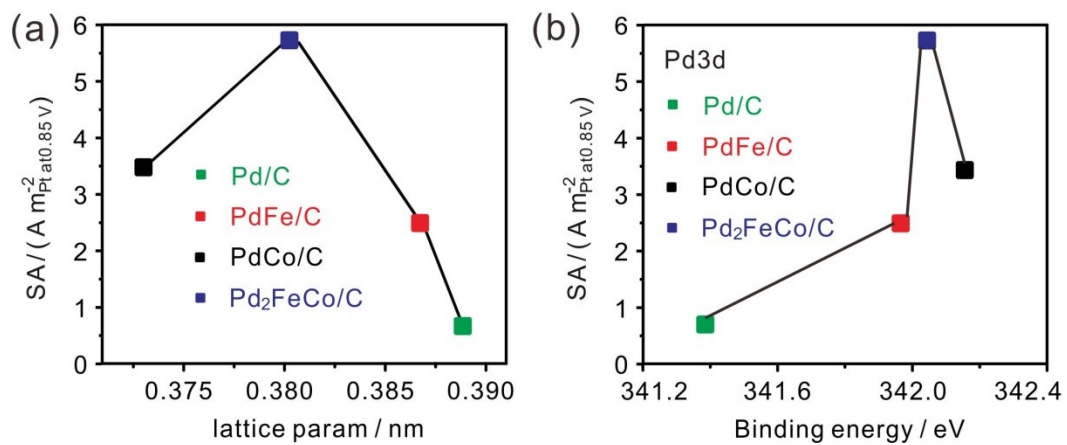

**Fig. S9** The relationship between specific activity and lattice constant (a), binding energy (b) of Pd.

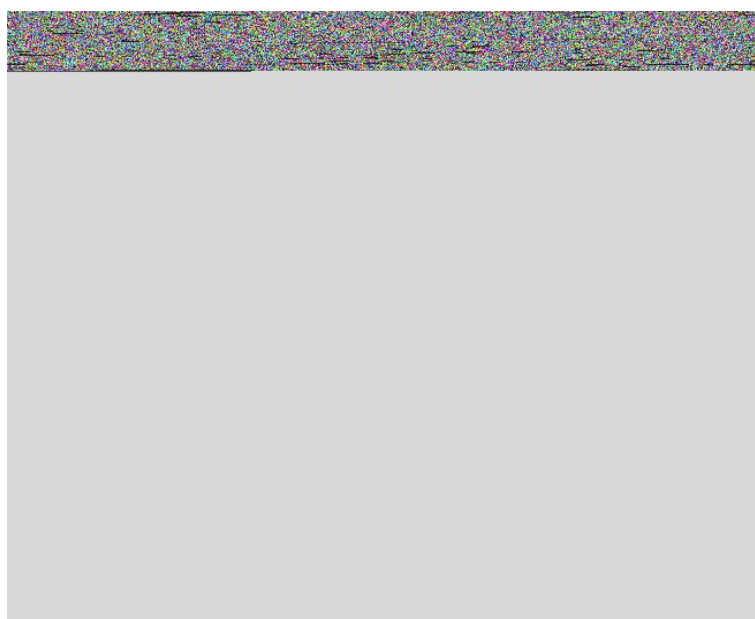

**Fig. S10** ORR polarization curves of Pd<sub>2</sub>FeCo/C-300 and Pd<sub>2</sub>FeCo/C-500.



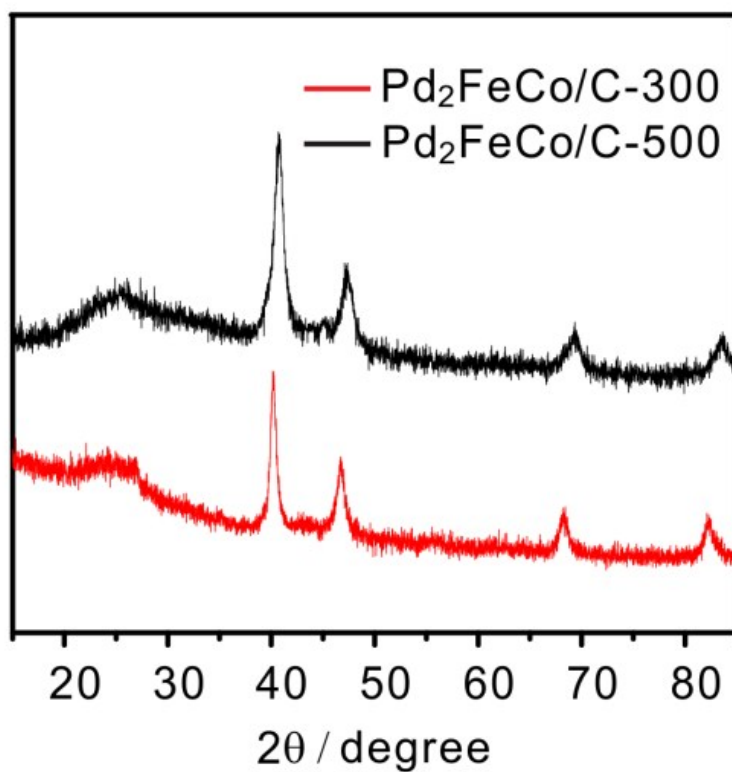

**Fig. S11** XRD patterns of Pd<sub>2</sub>FeCo/C-300 and Pd<sub>2</sub>FeCo/C-500.

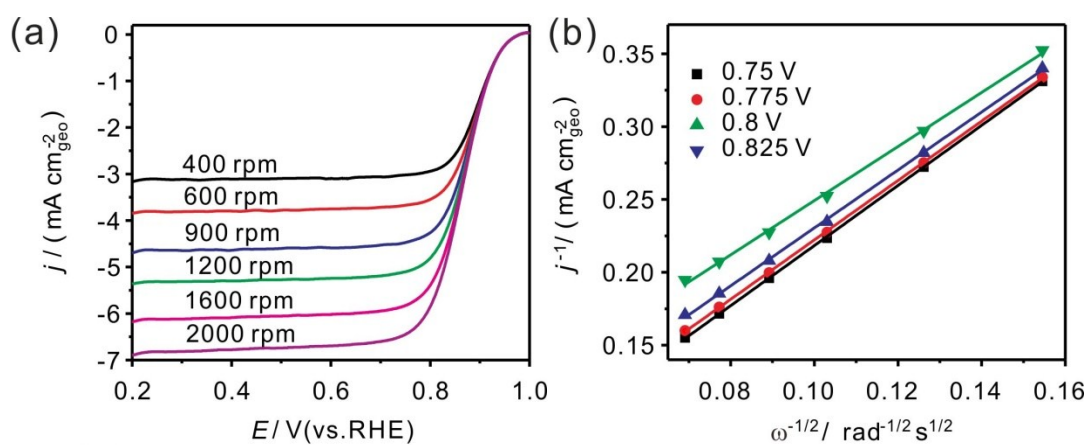

**Fig. S12** (a) The rotation-rate-dependent current-potential curves of Pd<sub>2</sub>FeCo@Pt/C.

(b) The Koutecky-Levich plots on Pd<sub>2</sub>FeCo@Pt/C at different potentials.

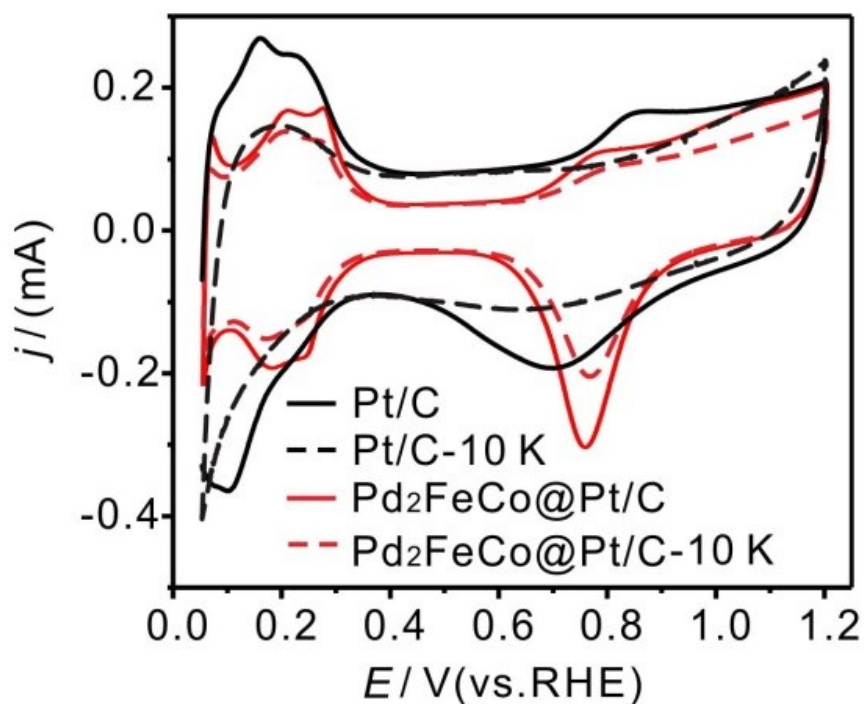

**Fig. S13** CV curves of Pd<sub>2</sub>FeCo@Pt/C and Pt/C nanoparticles before and after 10,000 cycles durability test in 0.1 M N<sub>2</sub>-saturated HClO<sub>4</sub>, sweep rate, 50 mV s<sup>-1</sup>.

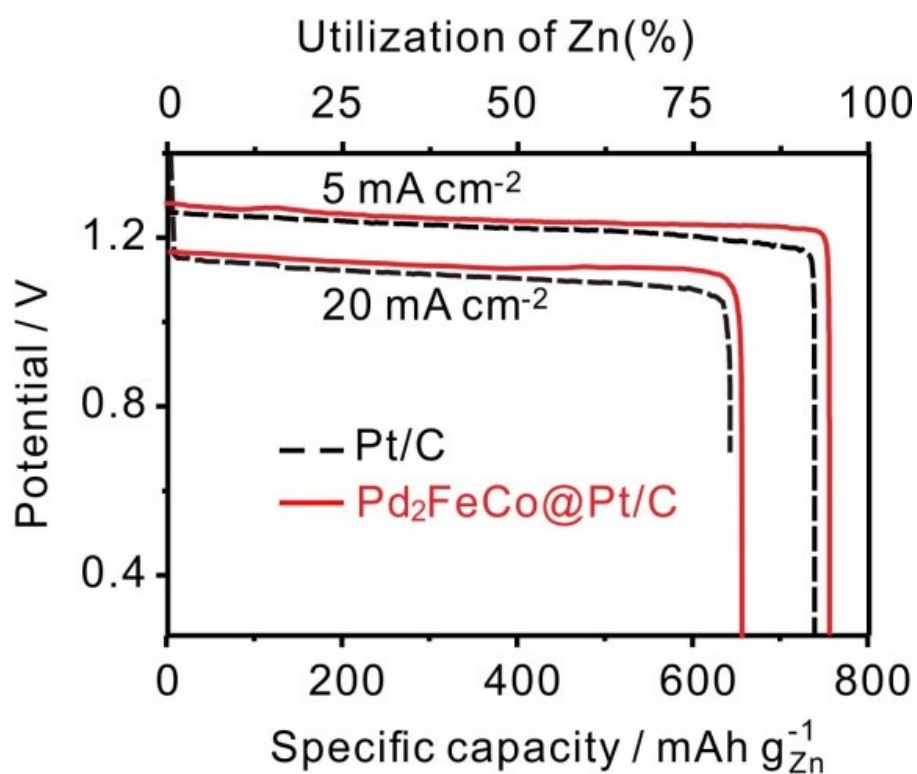

**Fig. S14** Specific capacities of the Zn-air batteries using Pd<sub>2</sub>FeCo@Pt/C and Pt/C as ORR catalyst at current densities of 5 and 20 mA cm<sup>-2</sup>.

## References

1. J. Park, L. Zhang, S. I. Choi, *ACS Nano*, 2015, **9**, 2635-2647.
2. L. Liu, G. Samjeske, S. Nagamatsu, *J. Phys. Chem. C*, 2012, **116**, 23453-23464.
3. S. Xie, S. I. Choi, N. Lu, *Nano Lett.*, 2014, **14**, 3570-3576.
4. X. Wang, M. Vara, M. Luo, *J. Am. Chem. Soc.*, 2015, **137**, 15036-15042.
5. X. Zhao, S. Chen, Z. Fang, *J. Am. Chem. Soc.*, 2015, **137**, 2804-2807.
6. K. Sasaki, H. Naohara, Y. M. Choi, *Nat. Commun.*, 2012, **3**, 1115.
7. H. H. Li, S. Y. Ma, Q. Q. Fu, *J. Am. Chem. Soc.*, 2015, **137**, 7862-7868.
8. H. Li, R. Yao, D. Wang, *J. Phys. Chem. C*, 2015, **119**, 4052-4061.
9. G. Wang, B. Huang, L. Xiao, *J. Am. Chem. Soc.*, 2014, **136**, 9643-9649.
10. J. Yang, X. Chen, X. Yang, *Energy Environ. Sci.*, 2012, **5**, 8976-8981.
11. S. I. Choi, M. Shao, N. Lu, *ACS Nano*, 2014, **8**, 10363-10371.
12. W. Xiao, J. Zhu, L. Han, S. Liu, J. Wang, *Nanoscale*, 2016, **8**, 14793-14802.
13. K. Qi, W. Zheng, X. Cui, *Nanoscale*, 2016, **8**, 1698-1703.
14. G. Wang, J. Guan, L. Xiao, *Nano Energy*, 2016, **29**, 268-274.
15. V. M. Dhavale, S. Kurungot, *ACS Catal.*, 2015, **5**, 1445-1452.
16. J. Park, M. Risch, G. Nam, M. Park, T. J. Shin, S. Park, M. G. Kim, Y. Shao-Horn, J. Cho, *Energy Environ. Sci.*, 2017, **10**, 129-136.
17. S. S. Shinde, C.-H. Lee, A. Sami, D.-H. Kim, S. U. Lee, J.-H. Lee, *ACS nano*, 2016, **11**, 347-357.
18. S. Patra, R. Choudhary, E. Roy, R. Madhuri, P. K. Sharma, *Nano Energy*, 2016, **30**, 118-129.
19. B. Li, X. Ge, F. T. Goh, T. A. Hor, D. Geng, G. Du, Z. Liu, J. Zhang, X. Liu, Y. Zong, *Nanoscale*, 2015, **7**, 1830-1838.
20. Y. Li, M. Gong, Y. Liang, J. Feng, J.-E. Kim, H. Wang, G. Hong, B. Zhang, H. Dai, *Nat. Commun.*, 2013, **4**, 1805.
21. M. Zeng, Y. Liu, F. Zhao, K. Nie, N. Han, X. Wang, W. Huang, X. Song, J. Zhong, Y. Li, *Adv. Funct. Mater.*, 2016, **26**, 4397.

22. G. Nam, J. Park, M. Choi, P. Oh, S. Park, M. G. Kim, N. Park, J. Cho, J.-S. Lee, *ACS Nano*, 2015, **9**, 6493-6501.
23. X. Han, X. Wu, C. Zhong, Y. Deng, N. Zhao, W. Hu, *Nano Energy*, 2016, **31**, 541-550.
24. P. Cai, Y. Hong, S. Ci, Z. Wen, *Nanoscale*, 2016, **8**, 20048-20055.
